## Correction: HOTAIR regulates HK2 expression by binding endogenous miR-125 and miR-143 in oesophageal squamous cell carcinoma progression

Jian Ma<sup>1,\*</sup>, Yanxin Fan<sup>2,\*</sup>, Tingting Feng<sup>1,3,\*</sup>, Fangjun Chen<sup>4</sup>, Zhipeng Xu<sup>1</sup>, Suqing Li<sup>1</sup>, Qingfeng Lin<sup>1</sup>, Xiaoting He<sup>1</sup>, Weihong Shi<sup>1,5</sup>, Yang Liu<sup>6</sup>, Zhihua Liu<sup>7</sup>, Bin Zhu<sup>1</sup> and Xiufeng Cao<sup>1</sup>

<sup>1</sup> Department of Surgical Oncology, Affiliated Nanjing First Hospital of Nanjing Medical University, Oncology Center of Nanjing Medical University, Nanjing 210008, Jiangsu Province, China

<sup>2</sup> Jiangsu Cancer Hospital, Medical School of Nanjing University, Nanjing 210008, Jiangsu Province, China

<sup>3</sup> Institute of Biology and Medical Sciences, Jiangsu Key Laboratory of Infection and Immunity, Soochow University, Suzhou 215123, Jiangsu Province, China

<sup>4</sup> The Comprehensive Cancer Centre of Drum Tower Hospital, Medical School of Nanjing University, Clinical Cancer Institute of Nanjing University, Nanjing 210008, Jiangsu Province, China

<sup>5</sup> Yancheng Vocational Institute of Health Sciences, Yancheng 224005, Jiangsu Province, China

<sup>6</sup> Department of Pharmacy, No.401 Hospital of Chinese People's Liberation Army, Qingdao 266071, Shandong Province, China

<sup>7</sup> State Key Laboratory of Molecular Oncology, National Cancer Center/Cancer Hospital, Chinese Academy of Medical Sciences, Beijing 100021, China

\* These authors have contributed equally to this work

**Published:** May 04, 2018

**Copyright:** Ma et al. This is an open-access article distributed under the terms of the Creative Commons Attribution License 3.0 (CC BY 3.0), which permits unrestricted use, distribution, and reproduction in any medium, provided the original author and source are credited.

**This article has been corrected:** The correct order of Author names are given below:

Jian Ma<sup>1,\*</sup>, Yanxin Fan<sup>2,\*</sup>, Tingting Feng<sup>1,3,\*</sup>, Fangjun Chen<sup>4</sup>, Zhipeng Xu<sup>1</sup>, Suqing Li<sup>1</sup>, Qingfeng Lin<sup>1</sup>, Xiaoting He<sup>1</sup>, Weihong Shi<sup>1,5</sup>, Yang Liu<sup>6</sup>, Zhihua Liu<sup>7</sup>, Bin Zhu<sup>1</sup> and Xiufeng Cao<sup>1</sup>

Original article: Oncotarget. 2017; 8:86410-86422. <https://doi.org/10.18632/oncotarget.21195>
